# Supplementary material for: Azathioprine Biotransformation in Young Patients with Inflammatory Bowel Disease: Contribution of Glutathione-S Transferase M1 and A1 Variants
Source: PubMed Central journal article supplement (PMC6523194; doi:10.3390/genes10040277), 2019-04-04
Supplement: genes-10-00277-s001.pdf [file genes-10-00277-s001.pdf]

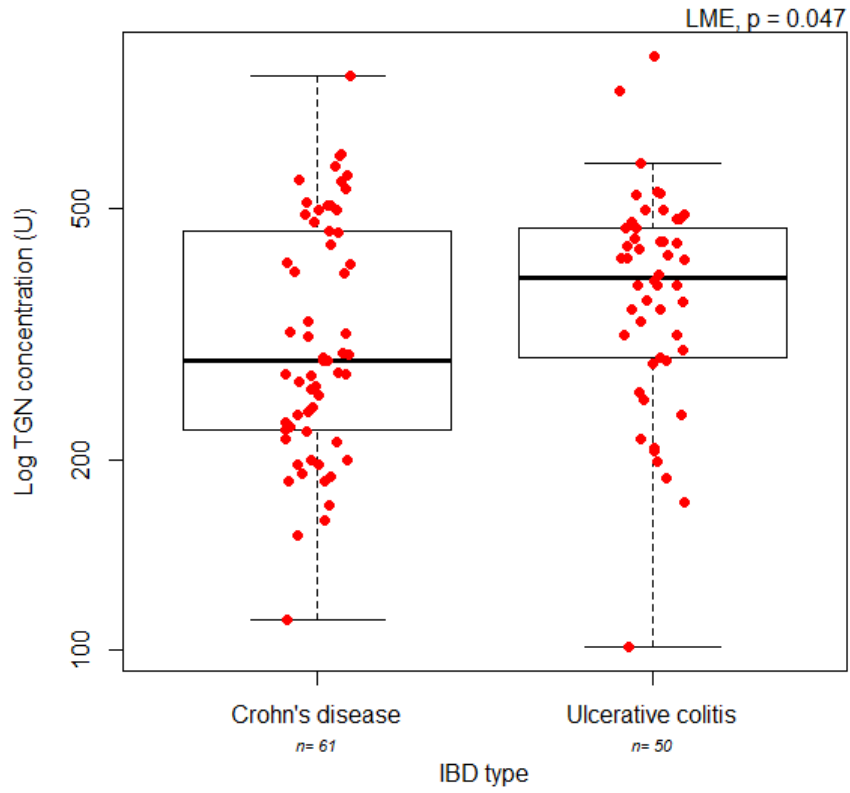

Supplementary Figure 1: inflammatory bowel disease (IBD type) and azathioprine thioguanine nucleotide (TGN) metabolites. Concentration of azathioprine metabolites is expressed as  $\text{pmol} / 8 \times 10^8$  erythrocytes (U). P-values are from linear mixed effect model (LME).

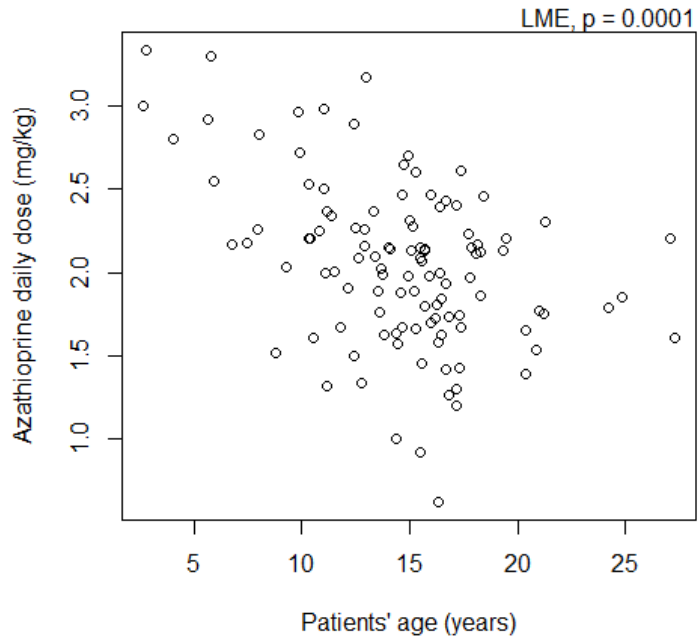

Supplementary Figure 2: Patient's age and azathioprine daily dose (mg/kg). P-values are from linear mixed effect model (LME).

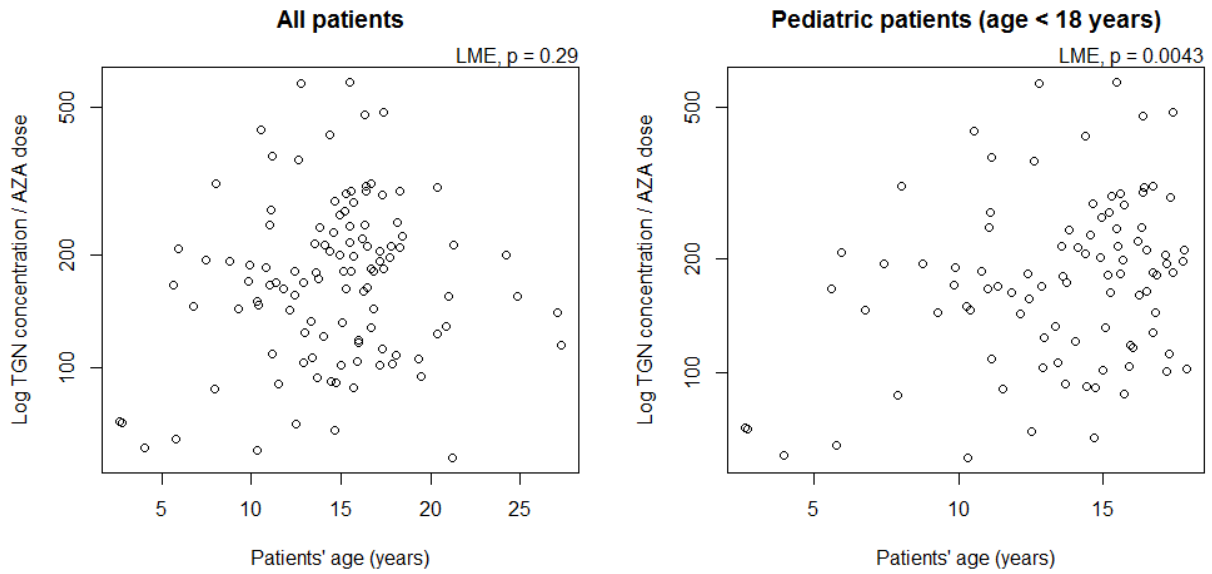

Supplementary Figure 3: Patient's age and ratio between concentration of azathioprine (AZA) thioguanine-nucleotide metabolites (TGN) and AZA daily dose. P-values are from linear mixed effect model (LME). Left panel shows data from all patients, while right panel displays data from pediatric patients (age less than 18 years).
